# Supplementary material for: Impacts of iron rust particle and weak alkalinity on surfactant micelle structure and drag reduction ability
Source: Royal Society of Chemistry journal article supplement (doi:10.1039/d2cp05116h), 2023-01-01
Supplement: d2cp05116h1.pdf [file d2cp05116h1.pdf]

## Supporting Information

### *Impacts of Iron Rust Particle and Weak Alkalinity on Surfactant Micelle Structure and Drag Reduction Ability*

*Na Xu<sup>a, b</sup>, Zilu Liu<sup>a</sup>, Fei Liu<sup>c, \*</sup>, Wei Hong<sup>c</sup>*

<sup>a</sup>College of Chemical Engineering and Technology, Taiyuan University of Technology, Taiyuan, 030024, P. R. China

<sup>b</sup>Shanxi Coking Coal in Yuncheng Salt Refco Group Ltd., Yuncheng, 044000, P. R. China

<sup>c</sup>Shenzhen Key Laboratory of Soft Mechanics & Smart Manufacturing, Department of Mechanics and Aerospace Engineering, Southern University of Science and Technology, Shenzhen, 518055, P. R. China

---

\*To the correspondence should be addressed. E-mail: liuf@sustech.edu.cn. Telephone: +86-755-88018182 (L.F.).

**Table S1:** The non-bonded parameters for CTAC, nanoparticles, NaSal and water in the MARTINI force field.

| Site 1 | Site 2 | $\epsilon_{ij}$ (kJ·mol <sup>-1</sup> ) | $\sigma_{ij}$ (nm) |
|--------|--------|-----------------------------------------|--------------------|
| Qa     | Qa     | 5.0                                     | 0.47               |
| Qa     | Q0     | 4.5                                     | 0.47               |
| Qa     | C2     | 2.0                                     | 0.62               |
| Qa     | C1     | 2.0                                     | 0.62               |
| Qa     | SC4    | 2.7                                     | 0.43               |
| Qa     | Qd     | 5.6                                     | 0.47               |
| Qa     | P4     | 5.6                                     | 0.47               |
| Qa     | BP4    | 5.6                                     | 0.47               |
| Q0     | Q0     | 3.5                                     | 0.47               |
| Q0     | C2     | 2.0                                     | 0.62               |
| Q0     | C1     | 2.0                                     | 0.62               |
| Q0     | SC4    | 2.7                                     | 0.47               |
| Q0     | Qd     | 4.5                                     | 0.47               |
| Q0     | P4     | 5.6                                     | 0.47               |
| Q0     | BP4    | 5.6                                     | 0.47               |
| C2     | C2     | 3.5                                     | 0.47               |
| C2     | C1     | 3.5                                     | 0.47               |
| C2     | SC4    | 3.1                                     | 0.47               |
| C2     | Qd     | 2.0                                     | 0.62               |
| C2     | P4     | 2.3                                     | 0.47               |
| C2     | BP4    | 2.3                                     | 0.47               |
| C1     | C1     | 3.5                                     | 0.47               |
| C1     | SC4    | 3.1                                     | 0.47               |

|     |     |     |      |
|-----|-----|-----|------|
| C1  | Qd  | 2.0 | 0.62 |
| C1  | P4  | 2.0 | 0.47 |
| C1  | BP4 | 2.0 | 0.47 |
| SC2 | SC4 | 3.1 | 0.43 |
| SC2 | Qd  | 2.0 | 0.62 |
| SC2 | P4  | 2.3 | 0.47 |
| SC2 | BP4 | 2.3 | 0.47 |
| SC4 | SC4 | 2.6 | 0.43 |
| SC4 | Qd  | 2.7 | 0.47 |
| SC4 | P4  | 2.7 | 0.47 |
| SC4 | BP4 | 2.7 | 0.47 |
| Qd  | Qd  | 5.0 | 0.47 |
| Qd  | P4  | 5.6 | 0.47 |
| Qd  | BP4 | 5.6 | 0.47 |
| P4  | P4  | 5.0 | 0.47 |
| P4  | BP4 | 5.0 | 0.57 |
| BP4 | BP4 | 5.0 | 0.47 |

---

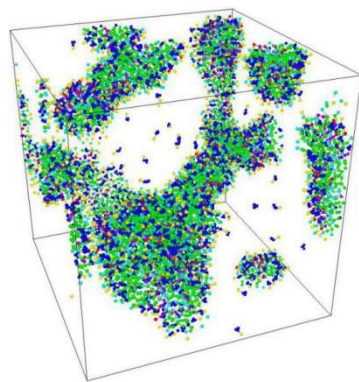

(a)

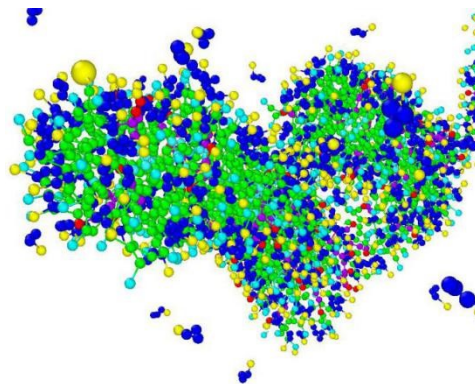

(b)

**Figure S1.** (a) A global perspective of the surfactant micells in the weak alkalinity solution. (b) Detailed morphology of a surfactant micelle in the weak alkalinity solution. Simulation conditions: The simulation box is  $27 \text{ nm} \times 27 \text{ nm} \times 27 \text{ nm}$ ;  $C_{\text{CTA}^+} = 0.20 \text{ mol}\cdot\text{L}^{-1}$ ,  $C_{\text{Sal}^-} = 0.20 \text{ mol}\cdot\text{L}^{-1}$ ,  $T = 300 \text{ K}$ ; The ratio of the modified  $\text{CTA}^+$  (existing in weakly alkaline solution) to the normal  $\text{CTA}^+$  (existing in neutral solution) is set to 1:1;  $\text{Cl}^-$  and water CG sites are hidden.

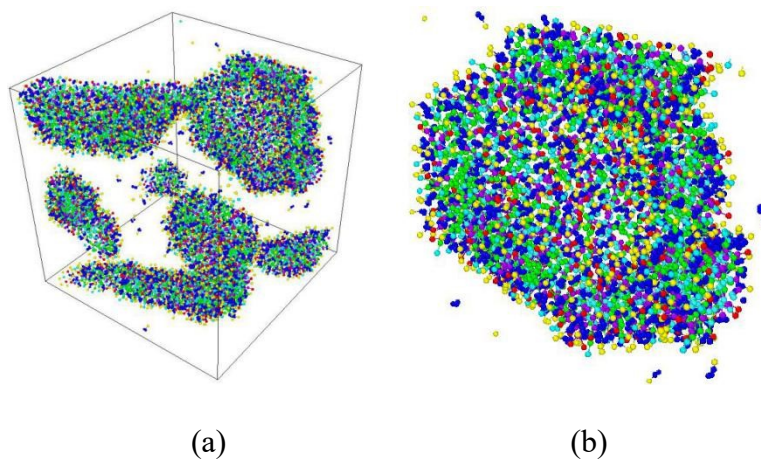

**Figure S2.** (a) A global perspective of the surfactant micells in the weak alkalinity solution. (b) A pie-like surfactant micelle in the weak alkalinity solution. Simulation conditions: The simulation box is  $27 \text{ nm} \times 27 \text{ nm} \times 27 \text{ nm}$ ;  $C_{\text{CTA}^+} = 0.40 \text{ mol}\cdot\text{L}^{-1}$ ,  $C_{\text{Sal}^-} = 0.40 \text{ mol}\cdot\text{L}^{-1}$ ,  $T = 300 \text{ K}$ ; The ratio of the modified  $\text{CTA}^+$  (existing in weakly alkaline solution) to the normal  $\text{CTA}^+$  (existing in neutral solution) is set to 1:1;  $\text{Cl}^-$  and water CG sites are hidden.

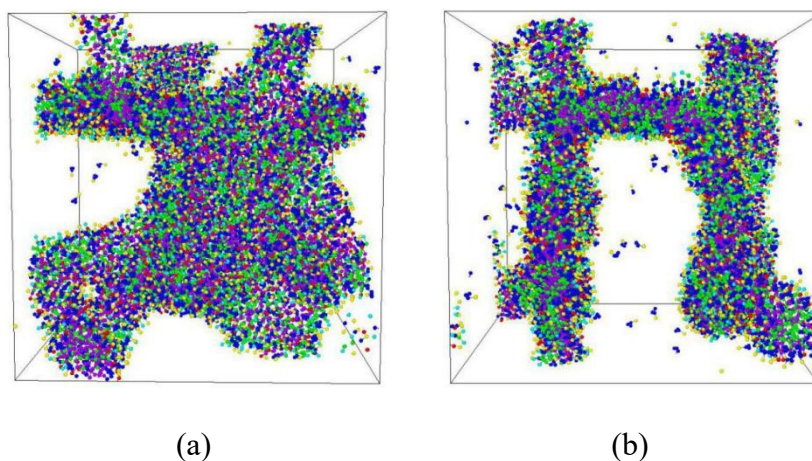

**Figure S3.** (a) A global perspective of the surfactant micells in the weak alkalinity solution. (b) A bridge-like surfactant micelle in the weak alkalinity solution. Simulation conditions: The

simulation box is  $27 \text{ nm} \times 27 \text{ nm} \times 27 \text{ nm}$ ;  $C_{\text{CTA}^+} = 0.50 \text{ mol}\cdot\text{L}^{-1}$ ,  $C_{\text{Sal}^-} = 0.50 \text{ mol}\cdot\text{L}^{-1}$ ,  $T = 300 \text{ K}$ ;  
The ratio of the modified  $\text{CTA}^+$  (existing in weakly alkaline solution) to the normal  $\text{CTA}^+$   
(existing in neutral solution) is set to 1:1;  $\text{Cl}^-$  and water CG sites are hidden.
